# Supplementary material for: Routine treatment of patients with chronic lymphocytic leukaemia by office-based haematologists in Germany—data from the Prospective Tumour Registry Lymphatic Neoplasms
Source: PubMed Central journal article supplement — Hematol Oncol. 2014 Apr 15;33(1):15–22. doi: 10.1002/hon.2139 (PMC4406436; doi:10.1002/hon.2139), 2014-04-15
Supplement: hon0033-0015-sd1.pdf [file hon0033-0015-sd1.pdf]

|                                                                 | Enrolment at First-Line Treatment |             |              |             | Enrolment at Second-Line Treatment |             |             |             |
|-----------------------------------------------------------------|-----------------------------------|-------------|--------------|-------------|------------------------------------|-------------|-------------|-------------|
|                                                                 | Total<br>N=620                    | BR<br>N=348 | FCR<br>N=137 | B<br>N=33   | Total<br>N=186                     | BR<br>N=107 | FCR<br>N=21 | B<br>N=20   |
| Age at primary diagnosis [n] <sup>a</sup>                       | 616                               | 346         | 136          | 33          | 185                                | 106         | 21          | 20          |
| Mean ± StD [yrs]                                                | 66.2 ± 10.6                       | 66.8 ± 10.2 | 60.0 ± 10.0  | 73.6 ± 5.4  | 65.1 ± 9.5                         | 65.2 ± 9.0  | 58.9 ± 9.3  | 66.9 ± 8.7  |
| Median [yrs]                                                    | 67.8                              | 68.0        | 61.3         | 74.0        | 66.3                               | 66.6        | 60.1        | 67.2        |
| Range [yrs]                                                     | 20.9 - 91.7                       | 31.1 - 91.7 | 20.9 - 75.5  | 64.7 - 85.5 | 34.6 - 87.2                        | 39.4 - 87.2 | 34.6 - 71.9 | 48.0 - 86.6 |
| Age at start of therapy [n] <sup>b</sup>                        | 620                               | 348         | 137          | 33          | 186                                | 107         | 21          | 20          |
| Mean ± StD [yrs]                                                | 69.6 ± 10.2                       | 70.2 ± 9.5  | 63.0 ± 9.5   | 77.8 ± 4.5  | 71.6 ± 9.2                         | 72.0 ± 8.0  | 64.2 ± 10.8 | 74.1 ± 8.6  |
| Median [yrs]                                                    | 70.8                              | 71.2        | 64.6         | 77.6        | 72.5                               | 72.4        | 67.0        | 73.0        |
| Range [yrs]                                                     | 21.3 - 92.1                       | 31.7 - 92.1 | 21.3 - 81.9  | 69.9 - 86.3 | 38.4 - 93.7                        | 46.2 - 88.8 | 38.4 - 81.0 | 55.4 - 93.7 |
| < 70 yrs [%]                                                    | 45.2                              | 42.5        | 73.7         | 3.0         | 36.0                               | 33.6        | 71.4        | 25.0        |
| Male [%]                                                        | 64.2                              | 65.2        | 71.5         | 54.5        | 57.0                               | 57.0        | 57.1        | 50.0        |
| BMI [n] <sup>a</sup>                                            | 604                               | 341         | 135          | 33          | 183                                | 105         | 20          | 20          |
| Mean ± StD [kg/m <sup>2</sup> ]                                 | 26.1 ± 4.1                        | 26.1 ± 3.9  | 26.2 ± 3.5   | 26.5 ± 5.4  | 26.3 ± 4.8                         | 26.6 ± 5.1  | 26.3 ± 6.3  | 24.6 ± 2.2  |
| underweight < 18.5 [%]                                          | 1.0                               | 0.6         | -            | 3.0         | 2.2                                | 2.9         | 5.0         | -           |
| obese >30 [%]                                                   | 15.4                              | 14.7        | 17.0         | 18          | 16.4                               | 18.1        | 20.0        | -           |
| Body Surface Area [n] <sup>a</sup>                              | 604                               | 341         | 135          | 33.0        | 183                                | 105         | 20          | 20          |
| Mean ± StD [m <sup>2</sup> ]                                    | 1.9 ± 0.2                         | 1.9 ± 0.2   | 1.9 ± 0.2    | 1.9 ± 0.2   | 1.8 ± 0.2                          | 1.9 ± 0.2   | 1.9 ± 0.2   | 1.8 ± 0.2   |
| Time between primary diagnosis and start of initial therapy [n] | 614                               | 345         | 136          | 32          | 178                                | 103         | 20          | 19          |
| Mean ± StD [yrs]                                                | 3.5 ± 4.2                         | 3.5 ± 4.2   | 3.0 ± 3.8    | 4.3 ± 4.3   | 3.1 ± 3.5                          | 3.2 ± 3.8   | 2.5 ± 2.8   | 3.8 ± 3.0   |
| Median [yrs]                                                    | 2.1                               | 2.1         | 1.7          | 3.5         | 2.0                                | 2.0         | 1.8         | 4.2         |
| Range [yrs]                                                     | 0.0 - 23.6                        | 0.0 - 23.3  | 0.0 - 23.6   | 0.0 - 15.2  | 0.0 - 29.8                         | 0.0 - 29.8  | 0.0 - 10.5  | 0.0 - 8.7   |

|                               | Enrolment at First-Line Treatment |      |             |      |              |      |           |      | Enrolment at Second-Line Treatment |      |             |      |             |      |           |      |
|-------------------------------|-----------------------------------|------|-------------|------|--------------|------|-----------|------|------------------------------------|------|-------------|------|-------------|------|-----------|------|
|                               | Total<br>N=620                    |      | BR<br>N=348 |      | FCR<br>N=137 |      | B<br>N=33 |      | Total<br>N=186                     |      | BR<br>N=107 |      | FCR<br>N=21 |      | B<br>N=20 |      |
|                               | N                                 | %    | N           | %    | N            | %    | N         | %    | N                                  | %    | N           | %    | N           | %    | N         | %    |
| ECOG Performance <sup>a</sup> | 571                               |      | 320         |      | 131          |      | 28        |      | 165                                |      | 94          |      | 18          |      | 18        |      |
| 0                             | 226                               | 39.6 | 131         | 40.9 | 57           | 43.5 | 8         | 28.6 | 51                                 | 30.9 | 33          | 35.1 | 9           | 50.0 | 6         | 33.3 |
| 1                             | 292                               | 51.1 | 162         | 50.6 | 67           | 51.1 | 15        | 53.6 | 93                                 | 56.4 | 54          | 57.4 | 9           | 50.0 | 10        | 55.6 |
| 2                             | 48                                | 8.4  | 26          | 8.1  | 7            | 5.3  | 2         | 7.1  | 21                                 | 12.7 | 7           | 7.4  | -           | -    | 2         | 11.1 |
| 3                             | 5                                 | 0.9  | 1           | 0.3  | -            | -    | 3         | 10.7 | -                                  | -    | -           | -    | -           | -    | -         | -    |
| 4                             | -                                 | -    | -           | -    | -            | -    | -         | -    | -                                  | -    | -           | -    | -           | -    | -         | -    |
| Tumour Stage <sup>a</sup>     | 608                               |      | 340         |      | 135          |      | 32        |      | 177                                |      | 101         |      | 21          |      | 18        |      |
| Binet A                       | 123                               | 20.2 | 66          | 19.4 | 27           | 20.0 | 8         | 25.0 | 35                                 | 19.8 | 18          | 17.8 | 4           | 19.0 | 3         | 16.7 |
| Binet B                       | 218                               | 35.9 | 123         | 36.2 | 61           | 45.2 | 7         | 21.9 | 63                                 | 35.6 | 39          | 38.6 | 11          | 52.4 | 3         | 16.7 |
| Binet C                       | 267                               | 43.9 | 151         | 44.4 | 47           | 34.8 | 17        | 53.1 | 79                                 | 44.6 | 44          | 43.6 | 6           | 28.6 | 12        | 66.7 |
| Splenomegaly <sup>a</sup>     | 595                               |      | 337         |      | 130          |      | 32        |      | 167                                |      | 94          |      | 19          |      | 19        |      |
| Presence                      | 374                               | 62.9 | 216         | 64.1 | 80           | 61.5 | 24        | 75.0 | 91                                 | 54.5 | 55          | 58.5 | 8           | 42.1 | 10        | 52.6 |
| Hepatomegaly <sup>a</sup>     | 587                               |      | 331         |      | 132          |      | 31        |      | 164                                |      | 93          |      | 19          |      | 19        |      |
| Presence                      | 75                                | 12.8 | 47          | 14.2 | 15           | 11.4 | 4         | 12.9 | 23                                 | 14.0 | 16          | 17.2 | 1           | 5.3  | 1         | 5.3  |
| Coombs-Test <sup>a</sup>      | 153                               |      | 83          |      | 33           |      | 8         |      | 33                                 |      | 18          |      | 3           |      | 3         |      |
| positive                      | 34                                | 22.2 | 18          | 21.7 | 4            | 12.1 | 4         | 50.0 | 10                                 | 30.3 | 4           | 22.2 | 1           | 33.3 | 2         | 66.7 |
| Leukocytes <sup>a</sup>       | 607                               |      | 343         |      | 133          |      | 30        |      | 182                                |      | 105         |      | 21          |      | 19        |      |
| (>15.000/μL)                  | 461                               | 75.9 | 259         | 75.5 | 108          | 81.2 | 20        | 66.7 | 119                                | 65.4 | 67          | 63.8 | 15          | 71.4 | 13        | 68.4 |
| Lymphocytes <sup>a</sup>      | 482                               |      | 280         |      | 96           |      | 24        |      | 149                                |      | 89          |      | 18          |      | 16        |      |
| (>5.000/μL)                   | 381                               | 79.0 | 221         | 78.9 | 80           | 83.3 | 17        | 70.8 | 113                                | 75.8 | 64          | 71.9 | 14          | 77.8 | 13        | 81.3 |
| Thrombocytes <sup>a</sup>     | 608                               |      | 343         |      | 133          |      | 31        |      | 183                                |      | 104         |      | 21          |      | 20        |      |
| (<100.000/μL)                 | 156                               | 25.7 | 90          | 26.2 | 30           | 22.6 | 8         | 25.8 | 52                                 | 28.4 | 28          | 26.9 | 3           | 14.3 | 8         | 40.0 |

|                                                    | Enrolment at First-Line Treatment |      |             |      |              |      |           |      | Enrolment at Second-Line Treatment |      |             |      |             |      |           |      |
|----------------------------------------------------|-----------------------------------|------|-------------|------|--------------|------|-----------|------|------------------------------------|------|-------------|------|-------------|------|-----------|------|
|                                                    | Total<br>N=620                    |      | BR<br>N=348 |      | FCR<br>N=137 |      | B<br>N=33 |      | Total<br>N=186                     |      | BR<br>N=107 |      | FCR<br>N=21 |      | B<br>N=20 |      |
|                                                    | N                                 | %    | N           | %    | N            | %    | N         | %    | N                                  | %    | N           | %    | N           | %    | N         | %    |
| Haemoglobin <sup>a</sup>                           | 610                               |      | 345         |      | 133          |      | 31        |      | 184                                |      | 105         |      | 21          |      | 20        |      |
| (<10g/dL)                                          | 147                               | 24.1 | 81          | 23.5 | 24           | 18.0 | 10        | 32.3 | 45                                 | 24.5 | 21          | 20.0 | 3           | 14.3 | 9         | 45.0 |
| LDH <sup>a</sup>                                   | 591                               |      | 333         |      | 133          |      | 32        |      | 182                                |      | 104         |      | 21          |      | 20        |      |
| elevated                                           | 245                               | 41.5 | 142         | 42.6 | 43           | 32.3 | 13        | 40.6 | 79                                 | 43.4 | 45          | 43.3 | 10          | 47.6 | 9         | 45.0 |
| Comorbidities <sup>a</sup>                         | 620                               |      | 348         |      | 137          |      | 33        |      | 185                                |      | 106         |      | 21          |      | 20        |      |
| Presence                                           | 429                               | 69.2 | 237         | 68.1 | 85           | 62.0 | 27        | 81.8 | 135                                | 73.0 | 80          | 75.5 | 10          | 47.6 | 16        | 80.0 |
| Charlson Comorbidity Index (CCI) Mean ± StD [0-34] | 0.8 ± 1.3                         |      | 0.7 ± 1.2   |      | 0.6 ± 1.0    |      | 1.5 ± 1.7 |      | 0.9 ± 1.3                          |      | 0.9 ± 1.2   |      | 0.5 ± 0.9   |      | 1.3 ± 1.6 |      |
| CCI 0                                              | 377                               |      | 215         |      | 94           |      | 10        |      | 101                                |      | 58          |      | 15          |      | 9         |      |
| CCI 1                                              | 118                               |      | 67          |      | 22           |      | 11        |      | 35                                 |      | 20          |      | 3           |      | 3         |      |
| CCI 2                                              | 77                                |      | 41          |      | 14           |      | 6         |      | 29                                 |      | 18          |      | 2           |      | 5         |      |
| CCI 3                                              | 24                                |      | 13          |      | 2            |      | 3         |      | 8                                  |      | 4           |      | 1           |      | 1         |      |
| CCI 4                                              | 9                                 |      | 4           |      | 3            |      | -         |      | 9                                  |      | 5           |      | -           |      | 1         |      |
| CCI 5                                              | 6                                 |      | 3           |      | 2            |      | 1         |      | 1                                  |      | -           |      | -           |      | -         |      |
| CCI 6                                              | 5                                 |      | 2           |      | -            |      | 1         |      | 2                                  |      | 1           |      | -           |      | 1         |      |
| CCI 7                                              | 3                                 |      | 2           |      | -            |      | 1         |      | -                                  |      | -           |      | -           |      | -         |      |
| CCI 8                                              | 1                                 |      | 1           |      | -            |      | -         |      | -                                  |      | -           |      | -           |      | -         |      |
| Cardiovascular disorders                           | 274                               | 44.2 | 147         | 42.2 | 50           | 36.5 | 19        | 57.6 | 76                                 | 41.1 | 44          | 41.5 | 4           | 19.0 | 10        | 50.0 |
| Diabetes                                           | 99                                | 16.0 | 53          | 15.2 | 22           | 16.1 | 10        | 30.3 | 29                                 | 15.7 | 12          | 11.3 | 3           | 14.3 | 6         | 30.0 |
| Renal disorders                                    | 31                                | 5.0  | 18          | 5.2  | 3            | 2.2  | 3         | 9.1  | 22                                 | 11.9 | 11          | 10.4 | -           | -    | 4         | 20.0 |
| Other Tumour                                       | 57                                | 9.2  | 31          | 8.9  | 9            | 6.6  | 4         | 12.1 | 21                                 | 11.4 | 13          | 12.3 | 3           | 14.3 | 3         | 15.0 |

|                                              | Enrolment at First-Line Treatment |      |             |      |              |      |           |      | Enrolment at Second-Line Treatment |      |             |      |             |      |           |      |
|----------------------------------------------|-----------------------------------|------|-------------|------|--------------|------|-----------|------|------------------------------------|------|-------------|------|-------------|------|-----------|------|
|                                              | Total<br>N=620                    |      | BR<br>N=348 |      | FCR<br>N=137 |      | B<br>N=33 |      | Total<br>N=186                     |      | BR<br>N=107 |      | FCR<br>N=21 |      | B<br>N=20 |      |
|                                              | N                                 | %    | N           | %    | N            | %    | N         | %    | N                                  | %    | N           | %    | N           | %    | N         | %    |
| B-Symptoms <sup>a</sup>                      | 606                               |      | 341         |      | 132          |      | 33        |      | 184                                |      | 106         |      | 20          |      | 20        |      |
| Presence of B-Symptoms                       | 176                               | 29.0 | 98          | 28.7 | 38           | 28.8 | 10        | 30.3 | 48                                 | 26.1 | 32          | 30.2 | 4           | 20.0 | 3         | 15.0 |
| Fever                                        | 15                                | 2.5  | 11          | 3.2  | 1            | 0.8  | -         | -    | 4                                  | 2.2  | 3           | 2.8  | 1           | 5.0  | -         | -    |
| Night sweats                                 | 139                               | 22.9 | 73          | 21.4 | 34           | 25.8 | 10        | 30.3 | 38                                 | 20.7 | 25          | 23.6 | 4           | 20.0 | 3         | 15.0 |
| Weight loss                                  | 62                                | 10.2 | 37          | 10.9 | 10           | 7.6  | 6         | 18.2 | 17                                 | 9.2  | 10          | 9.4  | -           | -    | 1         | 5.0  |
| Enlarged lymph node regions <sup>a</sup>     | 386                               |      | 219         |      | 89           |      | 18        |      | 100                                |      | 60          |      | 14          |      | 8         |      |
| 0                                            | 52                                | 13.5 | 32          | 14.6 | 4            | 4.5  | 3         | 16.7 | 11                                 | 11.0 | 6           | 10.0 | 1           | 7.1  | 1         | 12.5 |
| 1 or 2                                       | 78                                | 20.2 | 38          | 17.4 | 17           | 19.1 | 5         | 27.8 | 22                                 | 22.0 | 12          | 20.0 | 1           | 7.1  | 5         | 62.5 |
| ≥3                                           | 256                               | 66.3 | 149         | 68.0 | 68           | 76.4 | 10        | 55.6 | 67                                 | 67.0 | 42          | 70.0 | 12          | 85.7 | 2         | 25.0 |
| Bulky disease (lymphadenopathy) <sup>a</sup> | 558                               |      | 314         |      | 120          |      | 31        |      | 163                                |      | 93          |      | 20          |      | 19        |      |
| Presence                                     | 67                                | 12.0 | 37          | 11.8 | 18           | 15.0 | 5         | 16.1 | 27                                 | 16.6 | 17          | 18.3 | 6           | 30.0 | 1         | 5.3  |

<sup>a</sup> Parameter available for all patients at the time of their enrolment.

<sup>b</sup> Age at the time of enrolment into registry.

Abbreviations:

B: bendamustine ± prednisone | BR: bendamustine + rituximab ± prednisone | FCR: fludarabine+ cyclophosphamide + rituximab ± prednisone

BMI: body mass index; CCI: Charlson Comorbidity Index; ECOG: Eastern Cooperative Oncology Group; LDH: lactate dehydrogenase; StD: standard deviation; yrs: years
